# Supplementary material for: Effects of Vitamin and Amino Acid-Enriched Hyaluronic Acid Gel on the Healing of Oral Mucosa: In Vivo and In Vitro Study
Source: PubMed Central journal article supplement (PMC8003116; doi:10.3390/medicina57030285), 2021-03-18
Supplement: medicina-57-00285-s001.pdf [file medicina-57-00285-s001.pdf]

Table S1. The table shows gender, age, impacted tooth class following Winter classification and drug administration. Amx = Amoxicillin; NSAIDs = Ibuprofen 600mg administered in both study groups.

| PATIENT | GENDER | AGE | HAplus                                 |                    | No-HAplus                              |                    |
|---------|--------|-----|----------------------------------------|--------------------|----------------------------------------|--------------------|
|         |        |     | IMPACTED TOOTH (Winter Classification) | DRUG ADMINISTRATED | IMPACTED TOOTH (Winter Classification) | DRUG ADMINISTRATED |
| 1       | F      | 26  | Class 1                                | Amx;               | Class 1                                | Amx                |
| 2       | F      | 35  | Class 1                                | Amx; NSAIDs        | Class 1                                | Amx; NSAIDs        |
| 3       | F      | 40  | Class 2                                | Amx; NSAIDs        | Class 1                                | Amx; NSAIDs        |
| 4       | F      | 28  | Class 1                                | Amx                | Class 1                                | Amx; NSAIDs        |
| 5       | F      | 36  | Class 2                                | Amx; NSAIDs        | Class 2                                | Amx; NSAIDs        |
| 6       | F      | 25  | Class 1                                | Amx; NSAIDs        | Class 1                                | Amx; NSAIDs        |
| 7       | F      | 41  | Class 1                                | Amx                | Class 1                                | Amx                |
| 8       | M      | 39  | Class 1                                | Amx                | Class 1                                | Amx                |
| 9       | M      | 33  | Class 2                                | Amx; NSAIDs        | Class 2                                | Amx; NSAIDs        |
| 10      | M      | 37  | Class 1                                | Amx; NSAIDs        | Class 1                                | Amx; NSAIDs        |
